# Supplementary material for: Role of hydrocarbons in pore expansion and contraction of a flexible metal–organic framework
Source: Royal Society of Chemistry journal article supplement (doi:10.1039/c1cc11738f), 2011-01-01

Supporting Information for Chemical Communications

## Role of Hydrocarbons on Pore Expansion and Contraction of a Flexible Metal-Organic Framework

Radha Kishan Motkuri,<sup>†</sup> Praveen K. Thallapally,<sup>\*,†</sup> Satish K. Nune<sup>†</sup>, Carlos A. Fernandez<sup>†</sup>, B. Peter McGrail,<sup>†</sup> Jerry L. Atwood<sup>‡</sup>

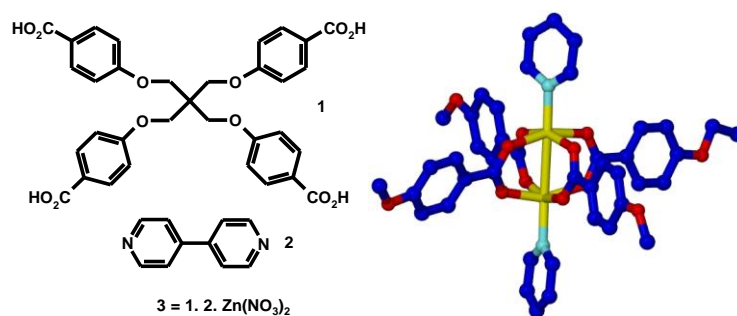

**Scheme 1.** Precursors used in the synthesis of TetZB and corresponding SBU unit.

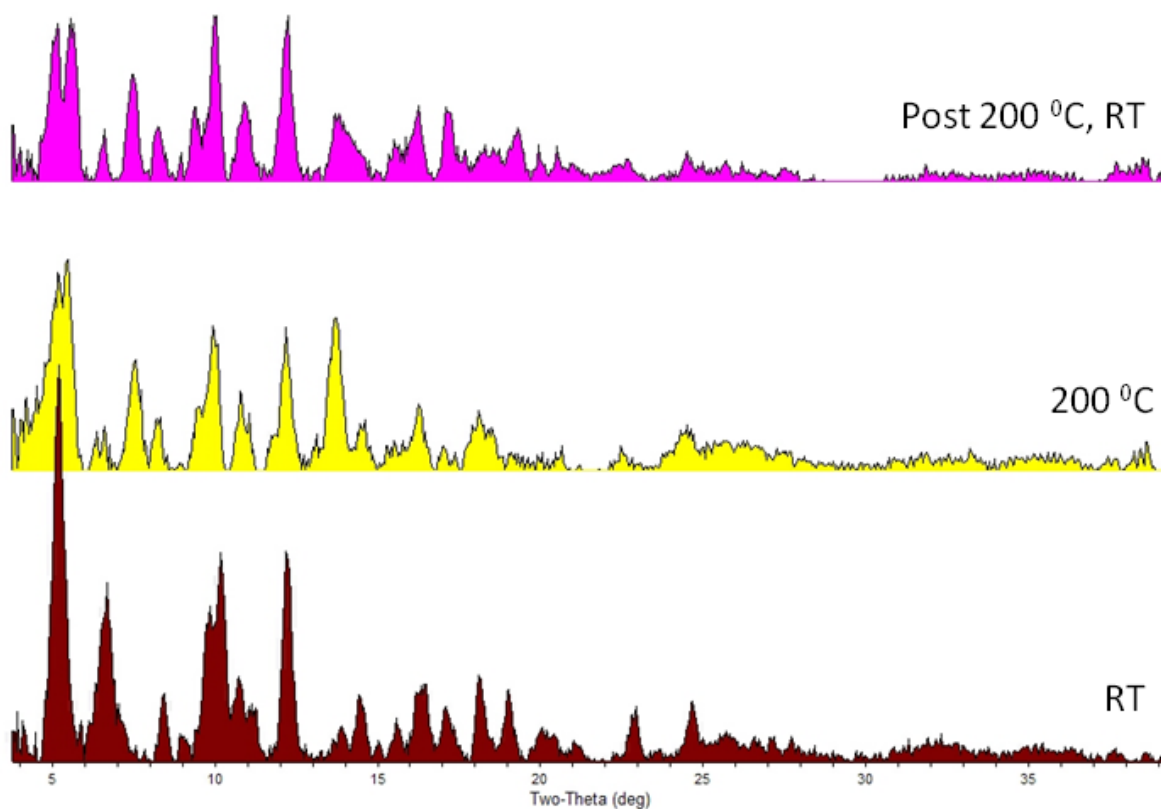

**Figure S2:** Powder XRD of the sample TaZnBP at RT, heated at 200 °C and cooled to RT

Dubinin-Radushkevich (DR) equation

In the form of  $Y=A+BX$

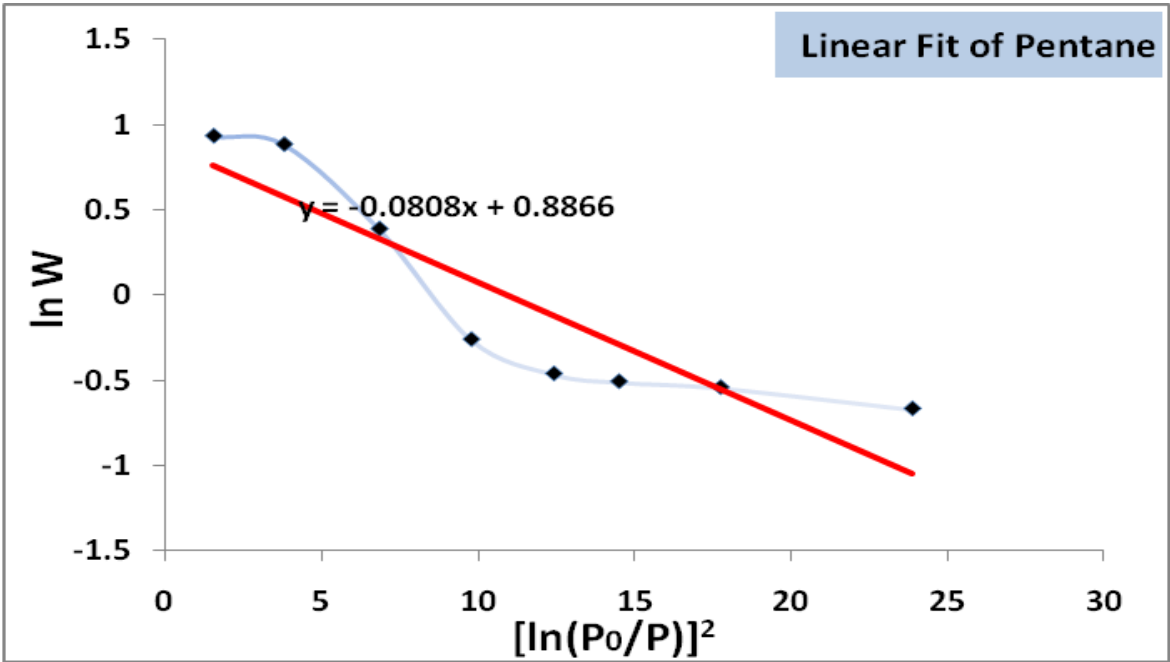

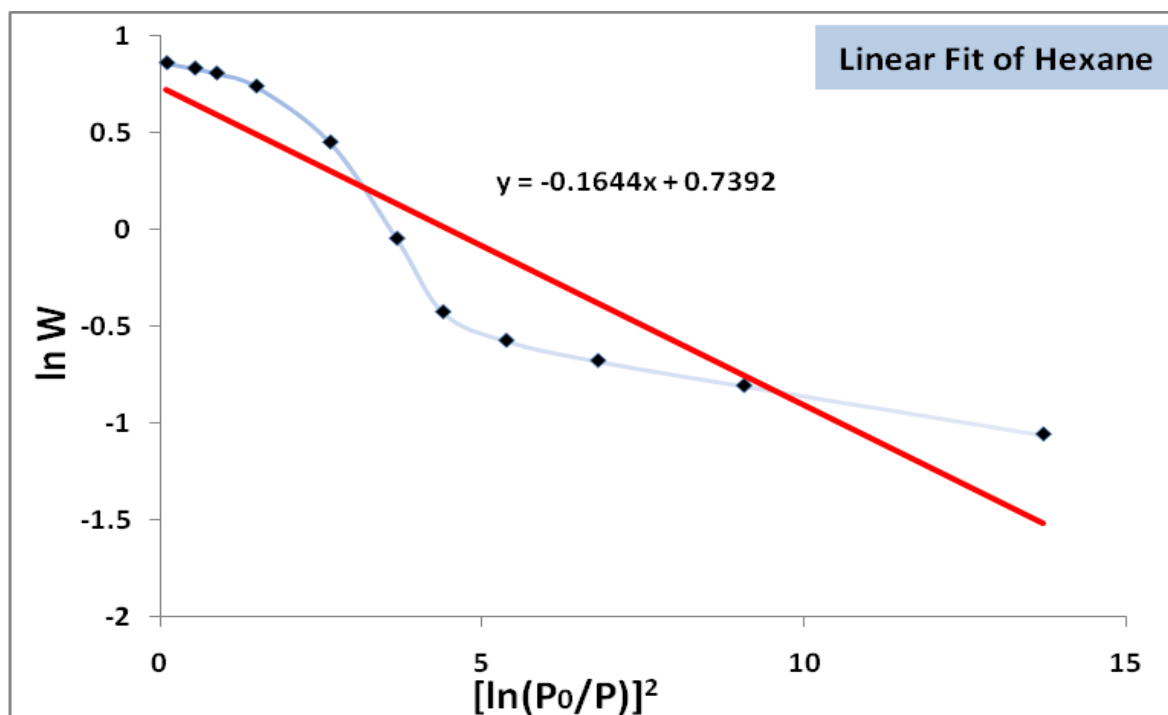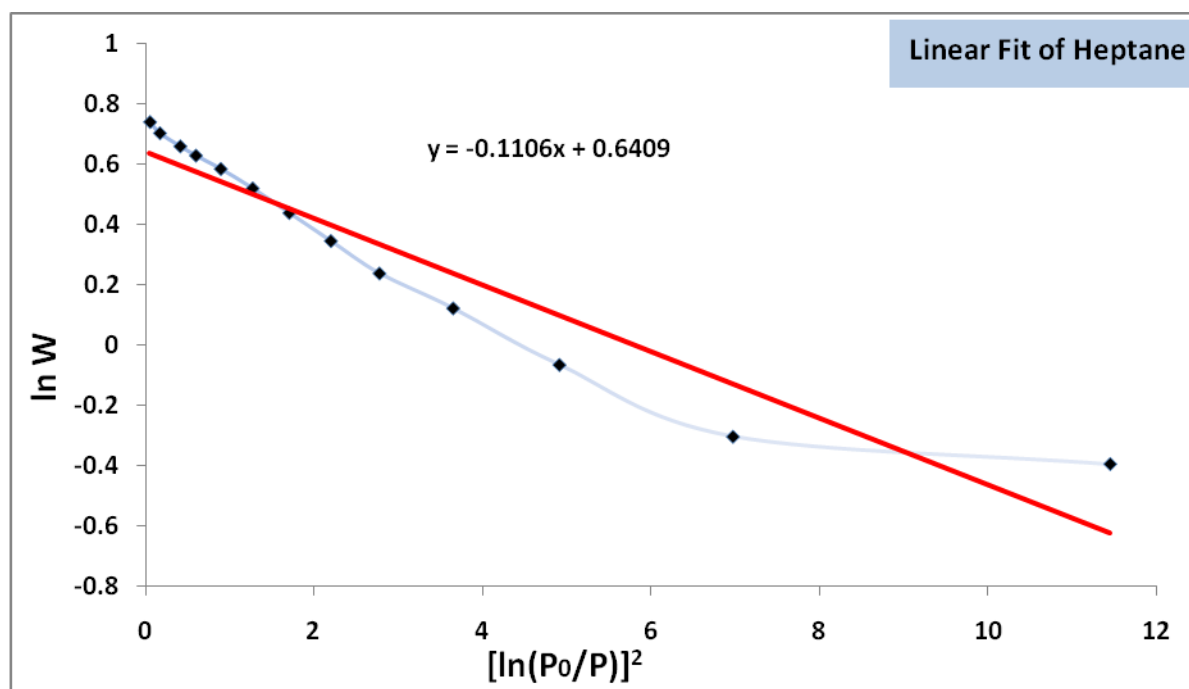

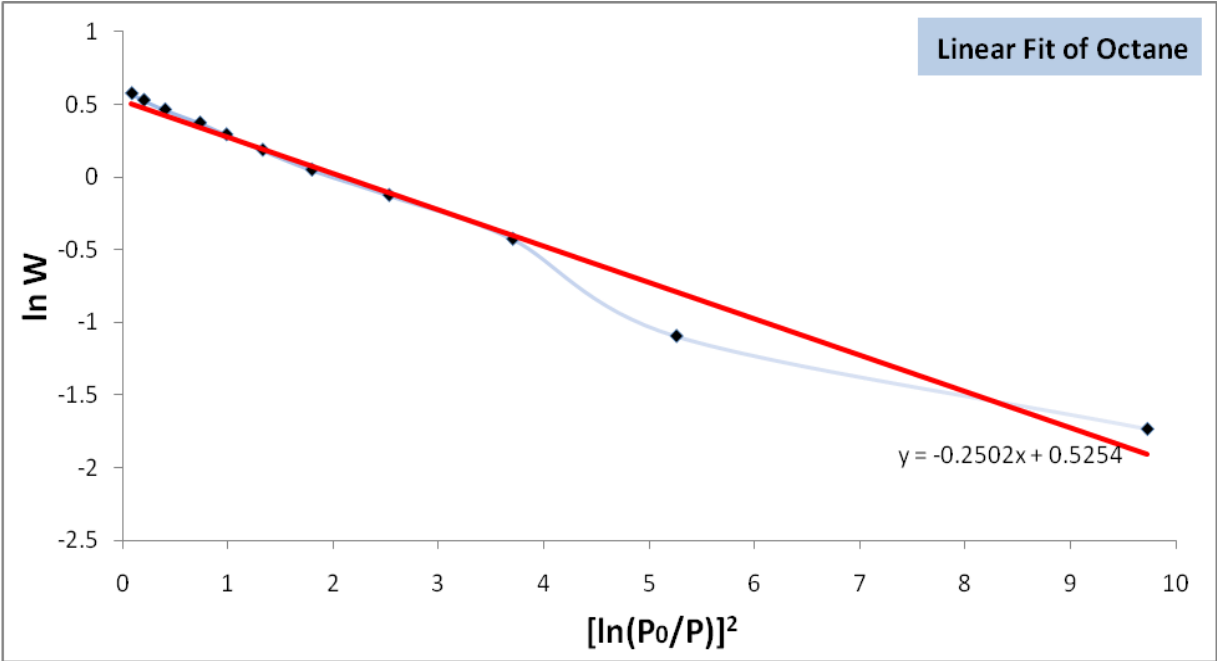

Supplement: c1cc11738f.pdf [file c1cc11738f.pdf]
